# Supplementary material
Source: MDPI journal article supplement (https://www.mdpi.com/2073-4352/9/10/537)
Supplement: s1 [file s1]

# Characterization and structural determination of cold-adapted monodehydroascorbate reductase, MDHAR, from the Antarctic hairgrass *Deschampsia antarctica*

Ae Kyung Park<sup>1†</sup>, Il-Sup Kim<sup>2†</sup>, Hackwon Do<sup>1</sup>, Hyun Kim<sup>1</sup>, Woong Choi<sup>1</sup>, Seung-Woo Jo<sup>3</sup>, Seung Chul Shin<sup>1</sup>, Jun Hyuck Lee<sup>1,5</sup>, Ho-Sung Yoon<sup>2,3,4</sup>, Han-Woo Kim<sup>1,5\*</sup>

<sup>1</sup> Unit of Research for Practical Application, Korea Polar Research Institute, Incheon 21990, South Korea

<sup>2</sup> Advanced Bioresource Research Center, Kyungpook National University, Daegu 41566, South Korea

<sup>3</sup> Department of Energy Science, Kyungpook National University, Daegu 41566, Korea

<sup>4</sup> School of Life Sciences, BK21 Plus KNU Creative BioResearch Group, Kyungpook National University, Daegu 41566, South Korea

<sup>5</sup> Department of Polar Sciences, University of Science and Technology, Incheon 21990, South Korea

\* Correspondence: hwkim@kopri.re.kr; Tel.: +82-32-760-5526

†These authors contributed equally to this work.

Table S1. Genotype of the strains used in this study

| Strain                          | Genotype                                                                                                                               | Source     |
|---------------------------------|----------------------------------------------------------------------------------------------------------------------------------------|------------|
| <i>Escherichia coli</i>         |                                                                                                                                        |            |
| BL21 (DE3)                      | F <sup>-</sup> <i>ompT hsdS<sub>B</sub> (r<sub>B</sub><sup>-</sup>, m<sub>B</sub><sup>-</sup>) gal dcm</i> (DE3)                       |            |
| DaMDHAR                         | F <sup>-</sup> <i>ompT hsdS<sub>B</sub> (r<sub>B</sub><sup>-</sup>, m<sub>B</sub><sup>-</sup>) gal dcm</i> (DE3),<br>pET28a(+):DaMDAHR | This study |
| <i>Saccharomyces cerevisiae</i> |                                                                                                                                        |            |
| BY4741                          | <i>MATa; his3Δ1; leu2Δ0; met15Δ0; ura3Δ0</i>                                                                                           | Euroscarf  |
| WT                              | <i>MATa; his3Δ1; leu2Δ0; met15Δ0; ura3Δ0</i> ; p426GPD                                                                                 | This study |
| DM                              | <i>MATa; his3Δ1; leu2Δ0; met15Δ0; ura3Δ0</i> ;<br>p426GPD::DaMDAHR                                                                     | This study |
| A2 ( <i>ara2Δ</i> )             | <i>MATa; his3Δ1; leu2Δ0; met15Δ0; ura3Δ0</i> ;<br><i>YMR041c::kanMX4</i>                                                               | Euroscarf  |
| DA                              | <i>MATa; his3Δ1; leu2Δ0; met15Δ0; ura3Δ0</i> ;<br><i>YMR041c::kanMX4</i> ; p426GPD::DaMDAHR                                            | This study |

\*\*Euroscarf, European *Saccharomyces cerevisiae* Archive for Functional Analysis

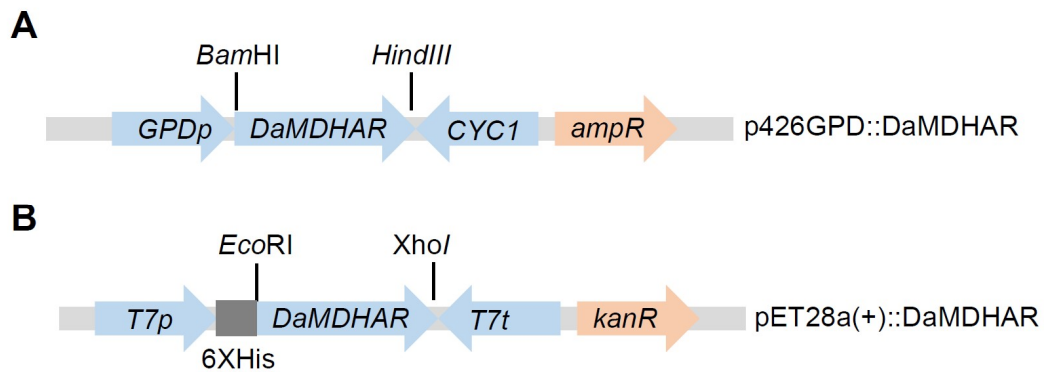

**Figure S1.** Schematic diagram of expression vector constructs for *Saccharomyces* (A) and *Escherichia coli* (B). Each PCR amplicon of *DaMDHAR* was subcloned to pET28a(+) and p426GPD digested with endonuclease enzymes, respectively. *T7p*, T7 promoter; 6×His, Hitidine-tagged region; *T7t*, T7 terminator; *kanR*, kanamycin-resistant gene; *GPDp*, glyceraldehyde-3-phosphate dehydrogenase promoter; *CYC1t*, *CYC1* terminator; *ampR*, ampicillin-resistant gene.
